# Supplementary material
Source: publisher site journal article supplement (https://www.degruyterbrill.com/publication/journal_key/NANOPH/downloadAsset/NANOPH_Author%20Statement%20Template.pdf)
Supplement: Supplementary file 1 [file NANOPH_Author%20Statement%20Template.pdf]

---

Strictly adhere to the below given format and ensure the following:

- Make sure that the information given in the author's statement below corresponds to the information in the manuscript, if applicable.
  - If no information is provided, default statements will be set in place, as given below.
  - If **Acknowledgments** are not applicable, remove.
  - If **Informed Consent** and **Ethical Approval** are not applicable, remove.
- 

### Acknowledgments

(If applicable)

### Research funding *(mandatory)*

None declared.

### Author contributions *(mandatory)*

All authors have accepted responsibility for the entire content of this manuscript and consented to its submission to the journal, reviewed all the results and approved the final version of the manuscript.

### Conflict of interest *(mandatory)*

Authors state no conflicts of interest.

### Informed consent

Informed consent was obtained from all individuals included in this study.

### Ethical approval

The conducted research is not related to either human or animals use.

### Data availability *(mandatory)*

Data sharing is not applicable to this article as no datasets were generated or analyzed during the current study.
